# Supplementary material for: Analysing the In-Use Stability of mRNA-LNP COVID-19 Vaccines Comirnaty™ (Pfizer) and Spikevax™ (Moderna): A Comparative Study of the Particulate
Source: MDPI journal article supplement (doi:10.3390/vaccines11111635), 2023-10-25
Supplement: s1 [file s1]

## Supplementary Data Figure S1

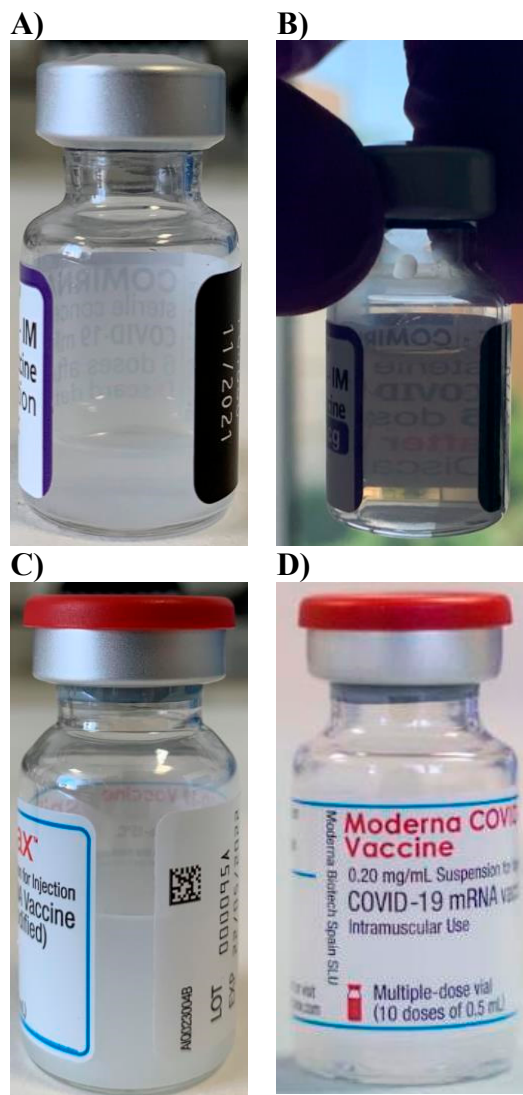

**Supplementary Data Figure S1.** Photographs of expired (A) and non-expired (B) Comirnaty vials; expired (C) and non-expired (D) Spikevax vials.

## Supplementary Data Figure S2

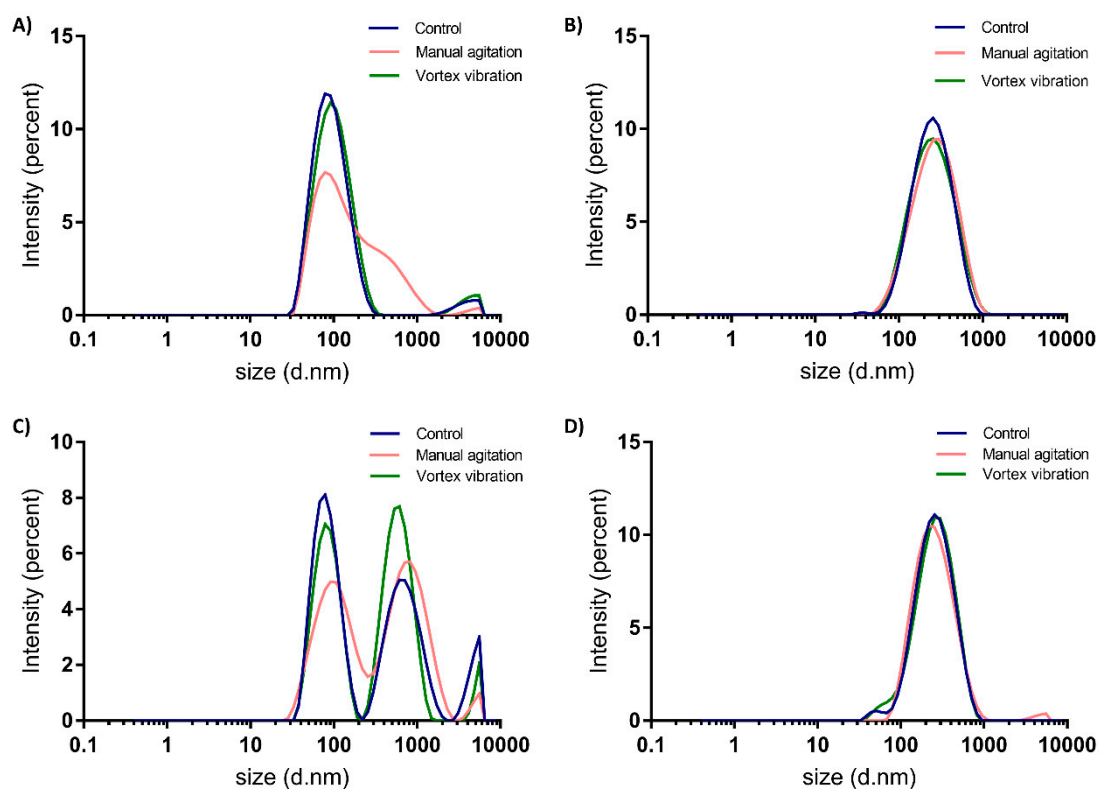

**Supplementary Data Figure S2.** Representative particle size distribution graphs by intensity of unexpired Comirnaty™ (A), unexpired Spikevax™ (B), expired Comirnaty™ (C) and expired Spikevax™ (D) samples subjected to mechanical stress.
